# Supplementary material for: Effect of pore-size distribution in cathodic gas diffusion layers on the electricity generation of microbial fuel cells (MFCs)
Source: Royal Society of Chemistry journal article supplement (doi:10.1039/c5ra19811a), 2015-01-01
Supplement: c5ra19811a1.pdf [file c5ra19811a1.pdf]

## Supplementary data

### Effect of pore-size distribution in cathodic gas diffusion layer on electricity generations of microbial fuel cells (MFCs)

Xinxin Shi\*, Tinglin Huang

School of Environmental and Municipal Engineering, Xi'an University of Architecture and  
Technology, Xi'an 710050, People's Republic of China

\*Corresponding author: Xinxin Shi, Email: [shixinxin@xauat.edu.cn](mailto:shixinxin@xauat.edu.cn)

Tel: +8613309236259

Table S1 Volumes of different pore diameters

| Pore diameter | Volumes (m <sup>3</sup> /g) |                       |                       |                       |
|---------------|-----------------------------|-----------------------|-----------------------|-----------------------|
|               | GDL-A                       | GDL-B                 | GDL-C                 | GDL-D                 |
| 3000          | 2.93×10 <sup>-4</sup>       | 1.98×10 <sup>-4</sup> | 2.71×10 <sup>-4</sup> | 2.47×10 <sup>-4</sup> |
| 1500          | 2.43×10 <sup>-4</sup>       | 1.80×10 <sup>-4</sup> | 2.28×10 <sup>-4</sup> | 2.36×10 <sup>-4</sup> |
| 1000          | 2.15×10 <sup>-4</sup>       | 8.80×10 <sup>-5</sup> | 1.17×10 <sup>-4</sup> | 1.59×10 <sup>-4</sup> |
| 500           | 0                           | 1.66×10 <sup>-4</sup> | 2.24×10 <sup>-4</sup> | 2.07×10 <sup>-4</sup> |
| 400           | 0                           | 0                     | 1.09×10 <sup>-4</sup> | 0                     |
| 300           | 2.42×10 <sup>-4</sup>       | 1.50×10 <sup>-4</sup> | 1.80×10 <sup>-4</sup> | 9.70×10 <sup>-5</sup> |
| 200           | 2.90×10 <sup>-5</sup>       | 3.20×10 <sup>-5</sup> | 3.90×10 <sup>-5</sup> | 6.60×10 <sup>-5</sup> |
| 150           | 0                           | 3.40×10 <sup>-5</sup> | 5.40×10 <sup>-5</sup> | 4.00×10 <sup>-5</sup> |
| 130           | 0                           | 3.30×10 <sup>-5</sup> | 4.60×10 <sup>-5</sup> | 3.30×10 <sup>-5</sup> |
| 110           | 3.00×10 <sup>-6</sup>       | 2.00×10 <sup>-5</sup> | 3.00×10 <sup>-5</sup> | 4.20×10 <sup>-5</sup> |
| 100           | 2.50×10 <sup>-5</sup>       | 3.50×10 <sup>-5</sup> | 4.80×10 <sup>-5</sup> | 2.90×10 <sup>-5</sup> |
| 90            | 1.40×10 <sup>-5</sup>       | 0                     | 0                     | 2.80×10 <sup>-5</sup> |
| 80            | 0                           | 0                     | 1.20×10 <sup>-5</sup> | 0                     |
| 70            | 0                           | 0                     | 9.00×10 <sup>-6</sup> | 1.30×10 <sup>-5</sup> |
| 60            | 0                           | 5.00×10 <sup>-6</sup> | 0                     | 0                     |
| 50            | 0                           | 0                     | 3.70×10 <sup>-5</sup> | 2.50×10 <sup>-5</sup> |
| 40            | 2.00×10 <sup>-6</sup>       | 2.20×10 <sup>-5</sup> | 4.60×10 <sup>-5</sup> | 7.00×10 <sup>-5</sup> |
| 30            | 0                           | 3.40×10 <sup>-6</sup> | 0                     | 2.10×10 <sup>-6</sup> |
| 20            | 2.50×10 <sup>-4</sup>       | 3.50×10 <sup>-4</sup> | 5.10×10 <sup>-4</sup> | 8.30×10 <sup>-5</sup> |

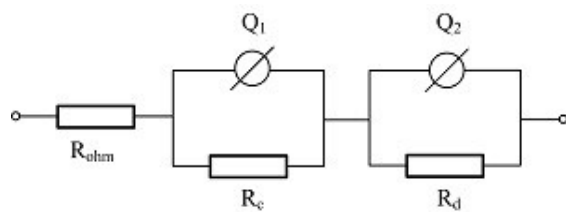

Fig. S1 Equivalent circuit for modeling the EIS of air cathodes

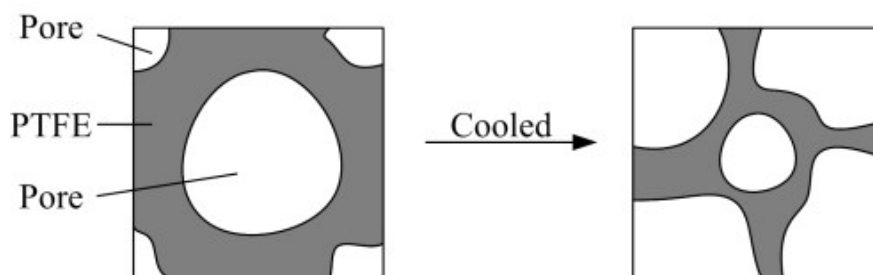

Fig. S2 Schematic diagram of the progress of PTFE contraction upon cooling.

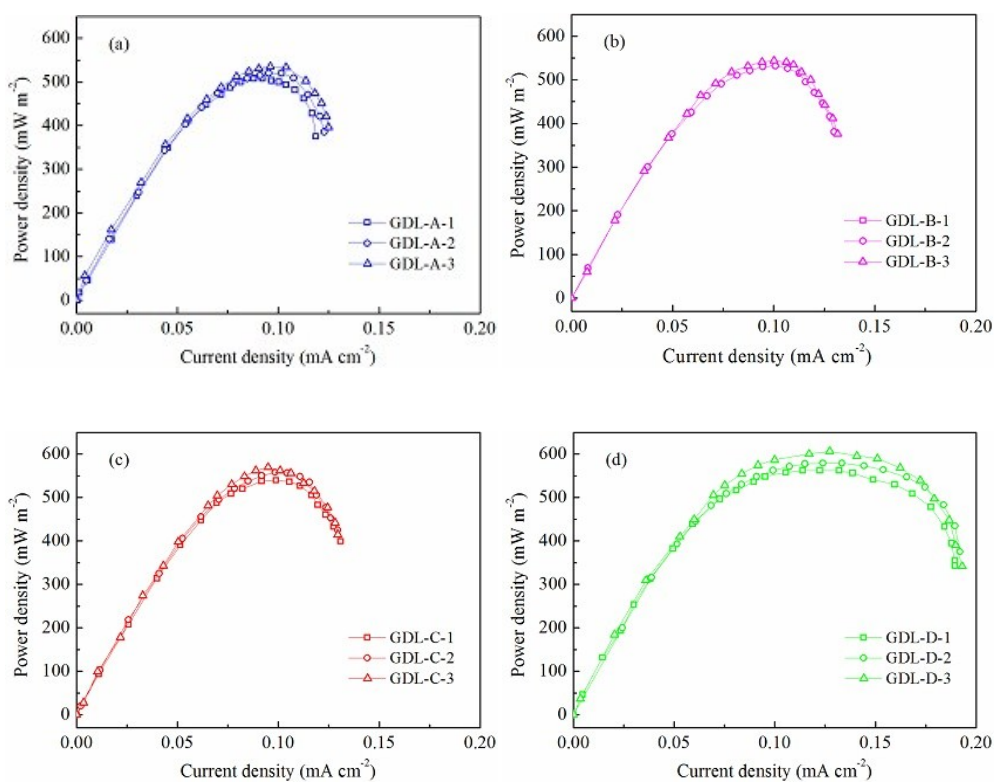

Fig. S3 Power densities of MFCs for triplicate GDLs

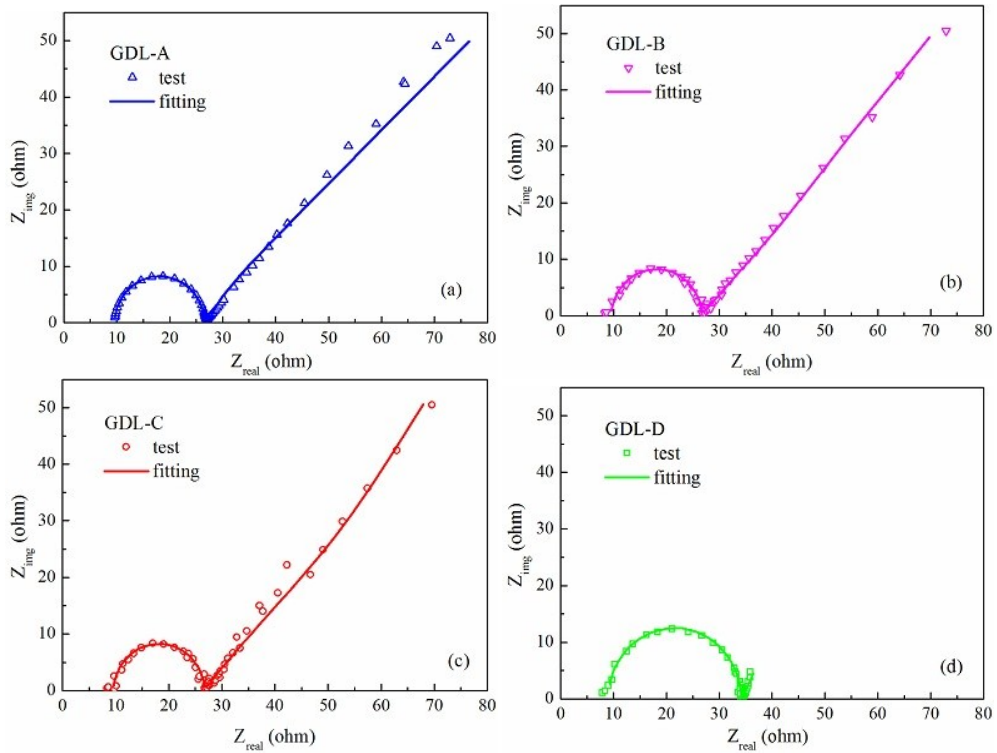

Fig. S4 Tested Nyquist plots (symbols) and least-squares fitting curves (lines) of cathodes with different GDLs
